# Supplementary material for: GABARAP suppresses EMT and breast cancer progression via the AKT/mTOR signaling pathway
Source: publisher site journal article supplement (doi:10.18632/aging.202510), 2021-02-11
Supplement: Supplementary file [file aging-v13i4-202510-supplementary-material-SD1.pdf]

SUPPLEMENTARY FIGURE

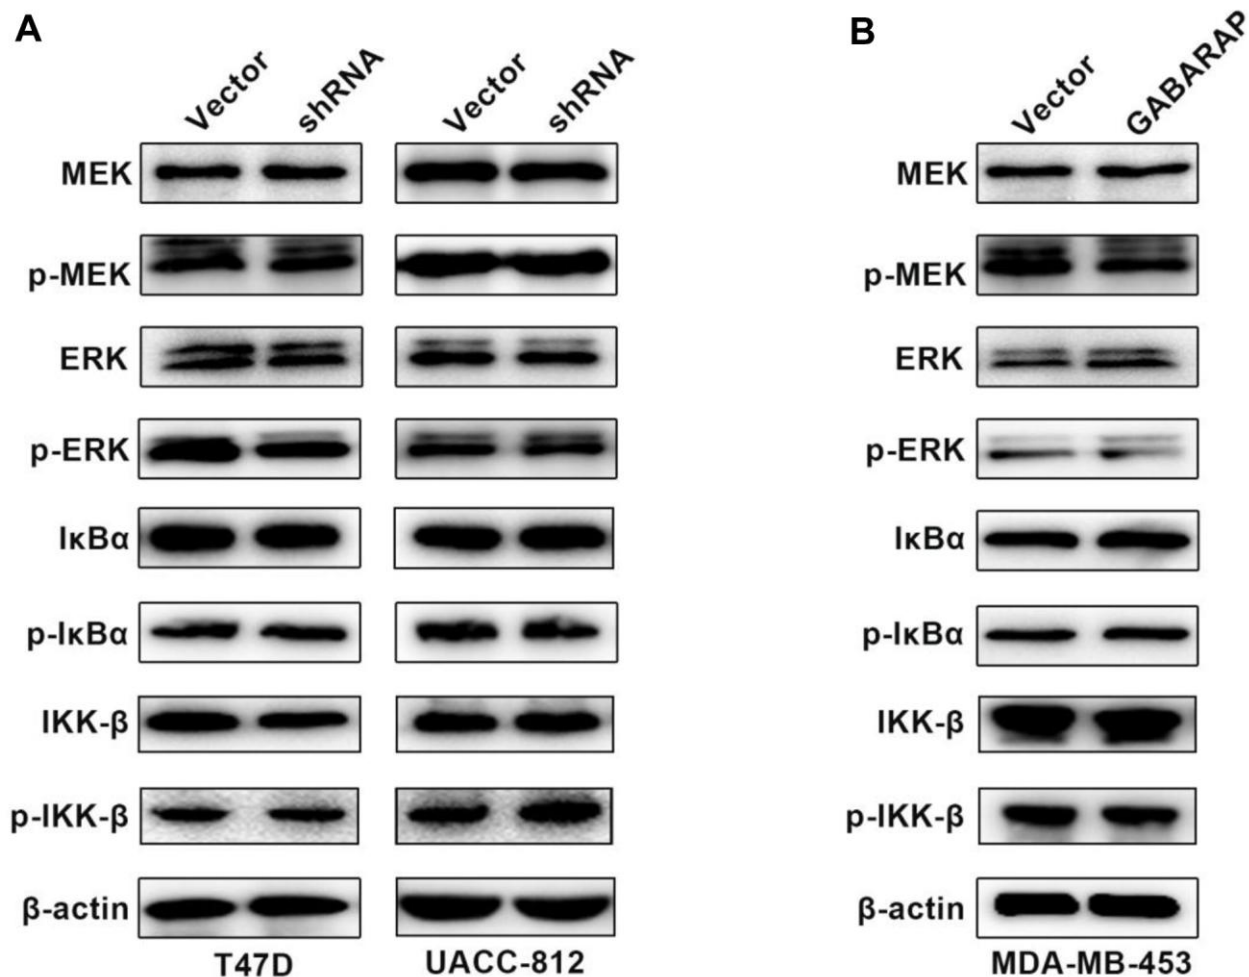

**Supplementary Figure 1. Downregulation or upregulation of GABARAP did not activate the NF-κB or ERK/MAPK signaling pathways.** (A) Western blot analyses were used to detect the expression levels of p-IKK-β, IKK-β, p-IκBα, IκBα, p-ERK, ERK, p-MEK, and MEK in T47D-vector, T47D-shRNA, UACC-812-vector, and UACC-812-shRNA cells. (B) Western blot analyses were used to detect the expression levels of p-IKK-β, IKK-β, p-IκBα, IκBα, p-ERK, ERK, p-MEK, and MEK in MDA-MB-453-vector and MDA-MB-453-GABARAP cells.
